# Supplementary material for: Diversity in Notch ligand-receptor signaling interactions
Source: eLife journal article supplement (doi:10.7554/elife.91422), 2023-11-13
Supplement: fig7-figsupp1-data4 [file elife-91422-fig7-figsupp1-data4-v1.zip]

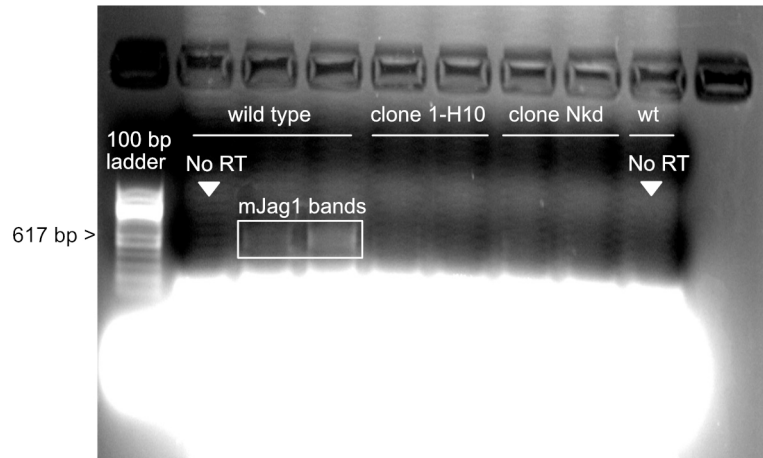

Figure 7 - figure supplement 1, source data 4. Original RT-PCR gel corresponding to Figure 7 - figure supplement 1, panel C. Shows the presence of endogenous Jag1 transcript in wildtype C2C12 cells and the absence of endogenous Jag1 transcript in CRISPR-treated C2C12 cell lines.
