# Supplementary material for: Diversity in Notch ligand-receptor signaling interactions
Source: eLife. 2025 Jan 3;12:RP91422. doi: 10.7554/eLife.91422 (PMC11698495; doi:10.7554/eLife.91422)
Supplement: Supplementary file 1. — These expression values in counts per million reads mapped (CPM) were obtained from the CHO gene expression visualization application (CGEVA) database of CHO RNA-sequencing (RNA-seq) data, including from wild-type CHO-K1 cells, located at https://anksi.shinyapps.io/biosciences/ (Singh et al., 2018). Dll1, Dll4, Jag2, and Mfng were not available in the database. See also Methods. [file elife-91422-supp1.xlsx]

## Sheet: Sheet1
Gene	Expression (CPM)
Notch1	6.66
Notch2	192.67
Notch3	8.14
Notch4	0.43
Jag1	9.58
Lfng	3.97
Rfng	71.51
