# Supplementary material for: Diversity in Notch ligand-receptor signaling interactions
Source: eLife. 2025 Jan 3;12:RP91422. doi: 10.7554/eLife.91422 (PMC11698495; doi:10.7554/eLife.91422)
Supplement: Supplementary file 2. — Where Tet-OFF inducible sender or receiver cells were used but don’t appear in the table above, 4-epi-Tc was used at a concentration of 500–800 ng/mL to fully suppress expression. [file elife-91422-supp2.xlsx]

## Sheet: Sheet1
Experiment	Cell type	Cell line (clone)	[4-epi-Tc] (ng/mL)
Figure 1-S2; Figure 1-S5; Figure 4B	CHO-K1	Notch1-H2B-mCh (F4)	0, 5, 10, 15, 20, 50, 500
Figure 1-S2; Figure 1-S5; Figure 4B	CHO-K1	Notch1-NGFR (2A6)	0, 5, 10, 15, 20, 50, 500
Figure 1-S2; Figure 4B	CHO-K1	Notch1-Dll1 (2G5)	0, 20, 50, 100, 200, 300, 500
Figure 1-S2; Figure 4B	CHO-K1	Notch1-Dll4 (1G11)	0, 40, 70, 100, 150, 200, 500
Figure 1-S2; Figure 4B	CHO-K1	Notch1-Jag1 (1E2)	0, 20, 50, 100, 200, 300, 500
Figure 1-S2; Figure 4B	CHO-K1	Notch1-Jag2 (2E10)	0, 40, 70, 100, 150, 200, 800
Figure 1-S2; Figure 4B	CHO-K1	Notch2-H2B-mCh (G2)	0, 5, 10, 15, 20, 50, 500
Figure 1-S2; Figure 4B	CHO-K1	Notch2-NGFR (1H4)	0, 5, 10, 15, 20, 50, 500
Figure 1-S2; Figure 4B	CHO-K1	Notch2-Dll1 (1C4)	0, 10, 20, 40, 100, 200, 500
Figure 1-S2; Figure 4B	CHO-K1	Notch2-Dll4 (1B8)	0, 10, 20, 40, 100, 200, 500
Figure 1-S2; Figure 4B	CHO-K1	Notch2-Jag1 (2B8)	0, 10, 20, 40, 100, 200, 500
Figure 1-S2; Figure 4B	CHO-K1	Notch2-Jag2 (1A1)	0, 10, 20, 40, 100, 200, 500
Figure 4D	CHO-K1	Notch2-Dll1 (1C4)	10, 500
Figure 4D	CHO-K1	Notch2-Dll4 (1B8)	10, 500
Figure 6	CHO-K1	Notch1-Dll1 (2G5)	0, 20, 50, 100, 200, 300, 500
Figure 6	CHO-K1	Notch1-Dll4 (1G11)	0, 40, 70, 100, 150, 200, 500
Figure 6	CHO-K1	Notch1-Jag1 (1E2)	0, 20, 50, 100, 200, 300, 500
Figure 6	CHO-K1	Notch1-Jag2 (2E10)	0, 40, 70, 100, 150, 200, 800
Figure 6	CHO-K1	Notch2-Dll1 (1C4)	0, 10, 20, 40, 100, 200, 500
Figure 6	CHO-K1	Notch2-Dll4 (1B8)	0, 10, 20, 40, 100, 200, 500
Figure 6	CHO-K1	Notch2-Jag1 (2B8)	0, 10, 20, 40, 100, 200, 500
Figure 6	CHO-K1	Notch2-Jag2 (1A1)	0, 10, 20, 40, 100, 200, 500
Figure 7C	C2C12-Nkd	Notch1-NGFR (1H6)	0, 10, 500
Figure 7C	C2C12-Nkd	Notch1-Dll4 (2D1)	0, 15, 500
Figure 7C	C2C12-Nkd	Notch1-Jag2 (1E7)	0, 25, 500
Figure 7C	C2C12-Nkd	Notch2-NGFR (1E9)	0, 10, 500
Figure 7C	C2C12-Nkd	Notch2-Dll4 (3B12)	0, 15, 500
Figure 7C	C2C12-Nkd	Notch2-Jag2 (1B12)	0, 25, 500
Figure 1-S3B	CHO-K1	Tet-OFF Dll1 (G1)	10
Figure 1-S3B	CHO-K1	Tet-OFF Dll4 (2D6)	5
Figure 4-S2	CHO-K1	Tet-OFF Dll1 (G1)	0
Figure 4-S2	CHO-K1	Tet-OFF Dll4 (2D6)	0
Figure 1-S3A; Figure 2D; Figure 2-S3	CHO-K1	Tet-OFF Dll1 (G1)	0, 20, 40, 60, 80, 100, 150, 500
Figure 1-S3A; Figure 2D; Figure 2-S3	CHO-K1	Tet-OFF Dll4 (2D6)	0, 10, 20, 30, 40, 60, 80, 500
Figure 1-S3A; Figure 2D; Figure 2-S3	CHO-K1	Tet-OFF Jag1 (1G3)	0, 5, 10, 15, 20, 35, 50, 500
Figure 1-S3A; Figure 2D; Figure 2-S3	CHO-K1	Tet-OFF Jag2 (1H6)	0, 5, 10, 15, 20, 25, 40, 500
Figure 5A; Figure 5-S1; Figure 5-S2; Figure 5-S3; Figure 5-S5	CHO-K1	Notch1-Dll1 (2G5)	0, 25, 50, 80, 500
Figure 5A; Figure 5-S1; Figure 5-S2; Figure 5-S3; Figure 5-S5	CHO-K1	Notch1-Dll4 (1G11)	0, 30, 50, 80, 120, 500
Figure 5A; Figure 5-S1; Figure 5-S2	CHO-K1	Notch1-Jag1 (1E2)	0, 5, 10, 20, 30, 500
Figure 5A; Figure 5-S1; Figure 5-S2; Figure 5-S3; Figure 5-S5	CHO-K1	Notch1-Jag2 (2E10)	0, 10, 20, 40, 800
Figure 5A; Figure 5-S1; Figure 5-S2; Figure 5-S3; Figure 5-S5	CHO-K1	Notch2-Dll1 (1C4)	0, 5, 15, 30, 500
Figure 5A; Figure 5-S1; Figure 5-S2; Figure 5-S3; Figure 5-S5	CHO-K1	Notch2-Dll4 (1B8)	0, 5, 15, 30, 500
Figure 5A; Figure 5-S1; Figure 5-S2; Figure 5-S3; Figure 5-S5	CHO-K1	Notch2-Jag1 (2B7)	0, 5, 15, 30, 500
Figure 5A; Figure 5-S1; Figure 5-S2; Figure 5-S3; Figure 5-S5	CHO-K1	Notch2-Jag2 (1A1)	0, 10, 25, 50, 500
