# Supplementary material for: Diversity in Notch ligand-receptor signaling interactions
Source: eLife. 2025 Jan 3;12:RP91422. doi: 10.7554/eLife.91422 (PMC11698495; doi:10.7554/eLife.91422)
Supplement: Supplementary file 3. — Where multiple receivers are listed, they were cultured with the same senders but in separate wells (receivers were not mixed together). All experiments with CHO-K1 cells used wild-type cells as negative sending controls and experiments with C2C12-Nkd receivers used the blank C2C12-Nkd parental line as negative controls. Clone identifiers are in parentheses; polyclonal cell lines lack parentheses. See senders’ ligand expression distributions in Figure 1C, Figure 1—figure supplement 3A, and Figure 6—figure supplement 1. [file elife-91422-supp3.xlsx]

## Sheet: Sheet1
Experiment	Cell type	Receivers (clone)	Sender (clone)
Figure 4A	CHO-K1	Notch1 (2D1)	Dll4-L1
Figure 4A	CHO-K1	Notch2 (2A4)	Dll1-L1
Figure 4B; Figure 4-S1	CHO-K1	Notch1-H2B-mCh (F4)	Dll1-L2
Figure 4B; Figure 4-S1	CHO-K1	Notch1-NGFR (2A6)	Dll1-L2
Figure 4B; Figure 4-S1	CHO-K1	Notch1-Dll1 (2G5)	Dll1-L2
Figure 4B; Figure 4-S1	CHO-K1	Notch1-Dll4 (1G11)	Dll1-L2
Figure 4B; Figure 4-S1	CHO-K1	Notch1-Jag1 (1E2)	Dll1-L2
Figure 4B; Figure 4-S1	CHO-K1	Notch1-Jag2 (2E10)	Dll1-L2
Figure 4B; Figure 4-S1	CHO-K1	Notch2-H2B-mCh (G2)	Dll1-L2
Figure 4B; Figure 4-S1	CHO-K1	Notch2-NGFR (1H4)	Dll1-L2
Figure 4B; Figure 4-S1	CHO-K1	Notch2-Dll1 (1C4)	Dll1-L2
Figure 4B; Figure 4-S1	CHO-K1	Notch2-Dll4 (1B8)	Dll1-L2
Figure 4B; Figure 4-S1	CHO-K1	Notch2-Jag1 (2B8)	Dll1-L2
Figure 4B; Figure 4-S1	CHO-K1	Notch2-Jag2 (1A1)	Dll1-L2
Figure 6; Figure 6-S1	CHO-K1	Notch1-Dll1 (2G5)	Dll1-L2, Dll4-L2, Jag1-L1, Jag2-A
Figure 6; Figure 6-S1	CHO-K1	Notch1-Dll4 (1G11)	Dll1-L2, Dll4-L2, Jag1-L1, Jag2-A
Figure 6; Figure 6-S1	CHO-K1	Notch1-Jag1 (1E2)	Dll1-L2, Dll4-L2, Jag1-L1, Jag2-A
Figure 6; Figure 6-S1	CHO-K1	Notch1-Jag2 (2E10)	Dll1-L2, Dll4-L2, Jag1-L1, Jag2-A
Figure 6; Figure 6-S1	CHO-K1	Notch2-Dll1 (1C4)	Dll1-L2, Dll4-L2, Jag1-L1, Jag2-A
Figure 6; Figure 6-S1	CHO-K1	Notch2-Dll4 (1B8)	Dll1-L2, Dll4-L2, Jag1-L1, Jag2-A
Figure 6; Figure 6-S1	CHO-K1	Notch2-Jag1 (2B8)	Dll1-L2, Dll4-L2, Jag1-L1, Jag2-A
Figure 6; Figure 6-S1	CHO-K1	Notch2-Jag2 (1A1)	Dll1-L2, Dll4-L2, Jag1-L1, Jag2-A
Figure 7B	C2C12-Nkd	Notch1 (1A5)	Dll1 (c19)
Figure 7B	C2C12-Nkd	Notch2 (c24)	Dll1 (c19)
Figure 7C	C2C12-Nkd	Notch1-NGFR (1H6)	Dll4 (2H10)
Figure 7C	C2C12-Nkd	Notch1-Dll4 (2D1)	Dll4 (2H10)
Figure 7C	C2C12-Nkd	Notch1-Jag2 (1E7)	Dll4 (2H10)
Figure 7C	C2C12-Nkd	Notch2-NGFR (1E9)	Dll4 (2H10)
Figure 7C	C2C12-Nkd	Notch2-Dll4 (3B12)	Dll4 (2H10)
Figure 7C	C2C12-Nkd	Notch2-Jag2 (1B12)	Dll4 (2H10)
Figure 2A-C; Figure 2-S1; Figure 2-S4	CHO-K1	Notch1 (2D1); Notch2 (2A4)	Dll1-L4A
Figure 2A-C; Figure 2-S1; Figure 2-S4	CHO-K1	Notch1 (2D1); Notch2 (2A4)	Dll1-L1
Figure 2A-C; Figure 2-S1; Figure 2-S4	CHO-K1	Notch1 (2D1); Notch2 (2A4)	Dll4-L4B
Figure 2A-C; Figure 2-S1; Figure 2-S4	CHO-K1	Notch1 (2D1); Notch2 (2A4)	Dll4-L1
Figure 2A-C; Figure 2-S1; Figure 2-S4	CHO-K1	Notch1 (2D1); Notch2 (2A4)	Jag1-L3
Figure 2A-C; Figure 2-S1; Figure 2-S4	CHO-K1	Notch1 (2D1); Notch2 (2A4)	Jag1-L1
Figure 2A-C; Figure 2-S1; Figure 2-S4	CHO-K1	Notch1 (2D1); Notch2 (2A4)	Jag2-AB
Figure 2A-C; Figure 2-S1; Figure 2-S4	CHO-K1	Notch1 (2D1); Notch2 (2A4)	Jag2-A
Figure 2A-C; Figure 2-S1	CHO-K1	Notch1-Dll1 (2G5)	Dll4-L4B
Figure 2A-C; Figure 2-S1	CHO-K1	Notch1-Dll1 (2G5)	Jag2-A
Figure 2A-C; Figure 2-S1	CHO-K1	Notch1-Dll4 (1G11)	Dll4-L4B
Figure 2A-C; Figure 2-S1	CHO-K1	Notch1-Dll4 (1G11)	Jag2-A
Figure 2A-C; Figure 2-S1	CHO-K1	Notch1-Jag1 (1E2)	Dll4-L4B
Figure 2A-C; Figure 2-S1	CHO-K1	Notch1-Jag1 (1E2)	Jag2-A
Figure 2A-C; Figure 2-S1	CHO-K1	Notch1-Jag2 (2E10)	Dll4-L4B
Figure 2A-C; Figure 2-S1	CHO-K1	Notch1-Jag2 (2E10)	Jag2-A
Figure 2A-C; Figure 2-S1	CHO-K1	Notch2-Jag1 (2B7); Notch2-Jag2 (1A1)	Dll4-L4B
Figure 2A-C; Figure 2-S1	CHO-K1	Notch2-Jag1 (2B7); Notch2-Jag2 (1A1)	Dll1-L4A
Figure 2A-C; Figure 2-S1	CHO-K1	Notch2-Jag1 (2B7); Notch2-Jag2 (1A1)	Jag2-B
Figure 2A-C; Figure 2-S1	CHO-K1	Notch1 (2D1); Notch2 (2A4)	Dll4-L4
Figure 2A-C; Figure 2-S1	CHO-K1	Notch1 (2D1); Notch2 (2A4)	Jag1-L2
Figure 2A-C; Figure 2-S1	CHO-K1	Notch1 (2D1); Notch2 (2A4)	Jag2-AA
Figure 7A	C2C12-Nkd	Notch1 (1A5)	Dll1 (c19)
Figure 7A	C2C12-Nkd	Notch1 (1A5)	Jag1 (c11)
Figure 7A	C2C12-Nkd	Notch2 (c24)	Dll1 (c19)
Figure 7A	C2C12-Nkd	Notch2 (c24)	Jag1 (c11)
Figure 2D; Figure 2-S3	CHO-K1	Notch1 (2D1); Notch2 (2A4)	Tet-OFF Dll1 (G1)
Figure 2D; Figure 2-S3	CHO-K1	Notch1 (2D1); Notch2 (2A4)	Tet-OFF Dll4 (2D6)
Figure 2D; Figure 2-S3	CHO-K1	Notch1 (2D1); Notch2 (2A4)	Tet-OFF Jag1 (1G3)
Figure 2D; Figure 2-S3	CHO-K1	Notch1 (2D1); Notch2 (2A4)	Tet-OFF Jag2 (1H6)
Figure 5A; Figure 5-S4; Figure 5-S1; Figure 5-S2	CHO-K1	Notch1-Dll1 (2G5)	Dll4-L1
Figure 5A; Figure 5-S4; Figure 5-S1; Figure 5-S2	CHO-K1	Notch1-Dll4 (1G11)	Dll4-L1
Figure 5A; Figure 5-S4; Figure 5-S1; Figure 5-S2	CHO-K1	Notch1-Jag1 (1E2)	Dll4-L1
Figure 5A; Figure 5-S4; Figure 5-S1; Figure 5-S2	CHO-K1	Notch1-Jag2 (2E10)	Dll4-L1
Figure 5A; Figure 5-S4; Figure 5-S1; Figure 5-S2	CHO-K1	Notch2-Dll1 (1C4)	Dll1-L1
Figure 5A; Figure 5-S4; Figure 5-S1; Figure 5-S2	CHO-K1	Notch2-Dll4 (1B8)	Dll1-L1
Figure 5A; Figure 5-S4; Figure 5-S1; Figure 5-S2	CHO-K1	Notch2-Jag1 (2B7)	Dll1-L1
Figure 5A; Figure 5-S4; Figure 5-S1; Figure 5-S2	CHO-K1	Notch2-Jag2 (1A1)	Dll1-L1
