# Supplementary material for: Diversity in Notch ligand-receptor signaling interactions
Source: eLife. 2025 Jan 3;12:RP91422. doi: 10.7554/eLife.91422 (PMC11698495; doi:10.7554/eLife.91422)
Supplement: Supplementary file 4. [file elife-91422-supp4.xlsx]

## Sheet: Sheet1
Experiment	Cell type	Receivers (clone)	Ligand (conc.)
Figure 7-S1A (plated ligand assay)	C2C12	C2C12 (wt)	Dll1-ext-Fc* (2 µg/mL)
Figure 7-S1A (plated ligand assay)	C2C12	C2C12 (Nkd)	Dll1-ext-Fc* (2 µg/mL)
Figure 3G,H (soluble ligand binding assay)	CHO-K1	Parental reporter (cH1); Notch1 (2D1); Notch2 (2A4)	Dll1-ext-Fc (1 nM)
Figure 3G,H (soluble ligand binding assay)	CHO-K1	Parental reporter (cH1); Notch1 (2D1); Notch2 (2A4)	Dll4-ext-Fc (1 nM)
Figure 3G,H (soluble ligand binding assay)	CHO-K1	Parental reporter (cH1); Notch1 (2D1); Notch2 (2A4)	Jag1-ext-Fc (0.5 nM)
Figure 3G,H (soluble ligand binding assay)	CHO-K1	Parental reporter (cH1); Notch1 (2D1); Notch2 (2A4)	Jag2-ext-Fc (1 nM)
Figure 3I (plated ligand assay)	CHO-K1	Notch1 (2D1)	Dll1-ext-Fc (75 and 150 nM)
Figure 3I (plated ligand assay)	CHO-K1	Notch1 (2D1)	Dll4-ext-Fc (50 nM)
Figure 3I (plated ligand assay)	CHO-K1	Notch1 (2D1)	Jag1-ext-Fc (20 and 50 nM)
Figure 3I (plated ligand assay)	CHO-K1	Notch1 (2D1)	IgG1 Fc (150 nM)
Figure 3B; Figure 3-S1 (plated ligand assay)	CHO-K1	Notch1 (2D1); Notch2 (2A4)	Dll1-ext-Fc (0.5, 1, 2, 3, 5, 10, 15, 25, 50, and 100 nM)
Figure 3B; Figure 3-S1 (plated ligand assay)	CHO-K1	Notch1 (2D1)	Dll4-ext-Fc (0.1, 0.5, 1, 2, 2.5, 3, 5, 10, and 15 nM)
Figure 3B; Figure 3-S1 (plated ligand assay)	CHO-K1	Notch1 (2D1)	Jag1-ext-Fc (0.5, 2, 3, 5, 10, 15, 25 and 50 nM)
Figure 3B; Figure 3-S1 (plated ligand assay)	CHO-K1	Notch1 (2D1); Notch2 (2A4)	Jag2-ext-Fc (0.5, 1, 2, 3, 5, 10, 15, 25, 50, and 100 nM)
Figure 3B; Figure 3-S1 (plated ligand assay)	CHO-K1	Notch1 (2D1); Notch2 (2A4)	IgG1 Fc (0.5, 2, 3, 5, 10, 15, 25, 50, and 100 nM)
Figure 3B; Figure 3-S1 (plated ligand assay)	CHO-K1	Notch2 (2A4)	Dll4-ext-Fc (0.1, 0.5, 1, 2, 5, 10, 15, 25, 50, and 100 nM)
Figure 3B; Figure 3-S1 (plated ligand assay)	CHO-K1	Notch2 (2A4)	Jag1-ext-Fc (0.5, 2, 3, 5, 10, 15, and 25 nM)
*Dll1-ext-Fc provided by Irwin Bernstein; all other recombinant ligands are from Bio-Techne/R&D Systems (see Key Resources Table)
