# Supplementary material for: Diversity in Notch ligand-receptor signaling interactions
Source: eLife. 2025 Jan 3;12:RP91422. doi: 10.7554/eLife.91422 (PMC11698495; doi:10.7554/eLife.91422)
Supplement: Supplementary file 5. [file elife-91422-supp5.xlsx]

## Sheet: Sheet1
PCR Method	Gene Target	Forward Primer	Reverse Primer
RT-PCR	Mouse Jag1	CCAAAGCCTCTCAACTTAGTGC	CTTAGTTTTCCCGCACTTGTGTTT
qRT-PCR	mCherry	CCTCAGTTCATGTACGGCTCC	TCGAAGTTCATCACGCGCTC
qRT-PCR	Mouse Notch1	ATGTCAATGTTCGAGGACCAG	TCACTGTTGCCTGTCTCAAG
qRT-PCR	Mouse Notch2	GGACTGTGAAGAGGACATCAAT	CACTGGCAGGAGAAGGTATTC
qRT-PCR	Mouse Notch3	TGCCAGGGAATTTCAGGTG	AGGCAAGAACAGGAAAAGGAG
qRT-PCR	Mouse SdhA (housekeeping)	AGTGGGCTGTCTTCCTTAAC	GGATTGCTTCTGTTTGCTTGG
qRT-PCR	CHO Lfng	GAGGAGCTGGCTTCTGTATTAG	AGCAGTGCTTCCACAATGTA
qRT-PCR	CHO or Mouse Rfng	GTCCTGAGAACCCACGTAATG	AGTGGGTGTCTGGGTAGAGAA
qRT-PCR	CHO Beta-actin (housekeeping)	ACTGGGACGATATGGAGAAG	GGTCATCTTTTCACGGTTGG
